# 1 Exploratory Validation of a Survey Instrument Based on the 2 Theory of Planned Behavior to Assess Vaping Attitude and 3 Perceptions

4 Short title: A novel instrument to assess vaping among students

5  
6 Muna Barakat<sup>1</sup>, Roa'a Abuarab<sup>2,#</sup>, Baraah Alkharabsheh<sup>2,#</sup>, Nada Budair<sup>2,#</sup>, Mais Fareed<sup>2,#</sup>,  
7 Rahma Kharabsheh<sup>2,#</sup>, Dana Oshroq Laban<sup>2,#</sup>, Malik Sallam<sup>3,4,\*</sup>

8 <sup>1</sup> Department of Clinical Pharmacy and Therapeutics, Faculty of Pharmacy, Applied Science  
9 Private University, Amman 11931, Jordan

10 <sup>2</sup> School of Medicine, The University of Jordan, Amman 11942, Jordan

11 <sup>3</sup> Department of Pathology, Microbiology and Forensic Medicine, School of Medicine, The  
12 University of Jordan, Amman 11942, Jordan

13 <sup>4</sup> Department of Clinical Laboratories and Forensic Medicine, Jordan University Hospital,  
14 Amman 11942, Jordan

15 **\*Corresponding Author:**

16 E-mail: [malik.sallam@ju.edu.jo](mailto:malik.sallam@ju.edu.jo); Tel.: +962-79-184-5186; Fax: +962-6-5353388

17 **#These authors contributed equally to this work**

18 **Emails and ORCIDs of the authors**

19 **Muna Barakat:** [m\\_barakat@asu.edu.jo](mailto:m_barakat@asu.edu.jo); <https://orcid.org/0000-0002-7966-1172>

20 **Roa'a Abuarab:** [roaa.abuarab24@gmail.com](mailto:roaa.abuarab24@gmail.com); <https://orcid.org/0009-0007-1931-0219>

21 **Baraah Alkharabsheh:** [baraahalkharabsheh864@gmail.com](mailto:baraahalkharabsheh864@gmail.com); <https://orcid.org/0009-0009-5087-9619>

22 **Nada Budair:** [budairnada279@gmail.com](mailto:budairnada279@gmail.com); <https://orcid.org/0009-0008-3395-929X>

23 **Mais Fareed:** [maisfareed273@gmail.com](mailto:maisfareed273@gmail.com); <https://orcid.org/0009-0002-3333-5968>

NOTE: This preprint reports new research that has not been certified by peer review and should not be used to guide clinical practice.

- 24 **Rahma Kharabsheh:** [rahma.kharabsheh@gmail.com](mailto:rahma.kharabsheh@gmail.com); <https://orcid.org/0009-0002-4043-1334>
- 25 **Dana Oshroq Laban:** [dandanoshroqlaban@gmail.com](mailto:dandanoshroqlaban@gmail.com); <https://orcid.org/0009-0000-0645-4888>
- 26 **Malik Sallam:** [malik.sallam@ju.edu.jo](mailto:malik.sallam@ju.edu.jo); <https://orcid.org/0000-0002-0165-9670>
- 27

## 28 **Abstract**

29 The prevalence of vaping (e-cigarette use) surged among young individuals, especially  
30 university students, highlighting the necessity to explore the factors influencing this behavior.  
31 This study aimed to develop and validate the Vaping Attitude and Perceptions Scale (VAPeS),  
32 based on the Theory of Planned Behavior (TPB). A cross-sectional design was employed using  
33 a self-administered electronic questionnaire to collect data from university students in Jordan.  
34 The questionnaire assessed demographic variables and key constructs of the VAPeS: Social  
35 Influence, Perceived Harms, Pleasure Derived from Vaping, Behavioral Influences, and  
36 Economic Factors and Self-Efficacy. The survey engaged 671 university students, with 201  
37 (30.0%) reporting the use of tobacco products. Among these tobacco users, a majority (n=126,  
38 62.7%) reported the current use of e-cigarettes. The exploratory factor analysis (EFA) using  
39 Principal Component Analysis (PCA) revealed a five-factor solution explaining 64.5% of the  
40 variance. These factors—Social Influence, Perceived Harms, Vaping Pleasure, Behavioral  
41 Influences, and Economic and Self-Efficacy—demonstrated high internal consistency.  
42 Regression analysis showed that Social Influence, Behavioral Influences, and sex were  
43 significant predictors of vaping behavior, with standardized coefficients of 0.494, 0.206, and  
44  $-0.154$ , respectively ( $P<.001$ ,  $P=.008$ , and  $P=.018$ ). The VAPeS displayed satisfactory  
45 psychometric properties, making it a valuable tool for investigating vaping behaviors among  
46 the youth. Factors such as Social Influence and Behavioral Influences were significant factors  
47 in shaping vaping behaviors among the participants. These insights emphasize the need to  
48 consider these dimensions in public health initiatives aimed at managing the rising vaping  
49 prevalence among university students. The VAPeS instrument can be utilized for better  
50 delineation of vaping behaviors among the younger demographic. Subsequently, the insights  
51 gained through VAPeS-based research can help devise targeted educational campaigns aimed  
52 at addressing the perceived social acceptability and the supposed safety of vaping.

## 53 **Introduction**

54 Tobacco consumption is widely recognized as an important health hazard, contributing to a  
55 wide range of chronic diseases and fatal illnesses (e.g., lung cancer, chronic obstructive  
56 pulmonary disease, coronary artery disease, etc.) [1]. Nevertheless, the prevalence of tobacco  
57 use remains high in various countries, including Jordan, which is ranked among the top  
58 countries for tobacco consumption among males worldwide [2,3]. The complexity of this  
59 challenge needs to be addressed via multiple approaches and the behavioral aspects is of  
60 particular importance considering the central role of the behavioral factors in determining  
61 tobacco consumption [4,5].

62 Vaping (e-cigarette use) is a relatively new appealing form of tobacco use and it represents an  
63 additional challenge for the efforts aiming to reduce tobacco consumption and its associated  
64 harm [6-8]. In university students and particularly among students in health schools, the  
65 perception of vaping as a less harmful alternative to traditional smoking or as a helpful method  
66 for smoking cessation might influence their attitudes and behaviors towards this form of  
67 smoking, despite the emerging evidence of vaping health risks [9-12].

68 The Theory of Planned Behavior (TPB) is a well-established psychological framework that can  
69 be valuable in understanding the determinants of health behavior in various contexts [13-17].  
70 This is particularly relevant upon studying a group like university students, including those  
71 studying in health schools with such students characterized by being well-informed about the  
72 health risks associated with smoking [18-26]. However, university students especially those  
73 studying in health schools, are often challenged by high levels of stress and anxiety related to  
74 academic pressure, which might influence their smoking behavior [27-29].

75 In Jordan among other countries and regions worldwide, the cultural and social norms can play  
76 a significant role in determining the smoking behavior, including vaping [30,31]. Thus, the  
77 TPB can be a helpful framework to understand the underlying factors driving such behavior  
78 [17]. According to the TPB, behavior is driven by three constructs: attitudes (the individual  
79 positive or negative attitude of the behavior), subjective norms (the perceived social pressure  
80 to engage in the behavior), and the perceived behavioral control (perceived ease of performing  
81 the behavior) [13].

82 University students in general might develop a positive attitude towards smoking as a coping  
83 mechanism for stress and anxiety, despite their knowledge of the health hazards of smoking  
84 [32,33]. This situation is further complicated by subjective norms in Jordan with high  
85 prevalence of smoking including the e-cigarette use [31,34]. In such a context, the social  
86 acceptance of smoking can be expected among families and peers, which can influence the  
87 individual behavior regarding smoking [35]. Moreover, the availability and accessibility of  
88 tobacco products and e-cigarettes, besides the perceived inability to resist social pressures or  
89 to find alternative stress-coping mechanisms, can be critical factors in the decision-making  
90 process of the general public as well as among university students [35,36].

91 Previous studies highlighted the rising trend of vaping in Jordan among other Middle East  
92 countries [8,12,31,37,38]. Therefore, the aim of this study was to evaluate the determinants of  
93 vaping among university students in Jordan. This pilot study can help to establish a survey  
94 instrument tailored to understand the behavioral determinants of vaping among university  
95 students in the Arab countries where the prevalence of vaping is rising [8,31,37]. Subsequently,  
96 the developed survey instrument can be used for a wider scale studies that can form the basis  
97 for evidence-based efforts to address the problem of smoking and the emerging issue of vaping  
98 in Arab countries.

99 The current study aimed to address significant gaps in the existing literature on e-cigarette use  
100 in the Middle East as elaborated on by Al-Hamdani & Brett Hopkins [37]. In their recent  
101 commentary, Al-Hamdani & Brett Hopkins highlighted the lack of standardized measurement  
102 instruments to assess e-cigarette use in the Middle East [37]. By employing a comprehensive  
103 survey instrument based on the TPB, our study aimed to delineate a broad spectrum of vaping  
104 attitudes and perceptions among university students in the Middle East through the use of a  
105 validated survey instrument which would set a new standard for consistency and comparability  
106 in future research, filling critical knowledge gaps and informing public health strategies  
107 regionally.

108

109

110

111

112

## 113 **Materials and Methods**

### 114 **Study design and ethics statement**

115 The study was designed as a cross-sectional survey utilizing an electronic format for data  
116 collection. The study was approved by the Institutional Review Board (IRB) at the Faculty of  
117 Pharmacy, Applied Science Private University (reference number: 2024-PHA-2). Providing an  
118 electronic informed consent was required for participants to complete the survey successfully,  
119 and no identifying information was collected.

### 120 **Sampling methodology**

121 To expedite data collection, a convenience sampling strategy was implemented. The initiation  
122 of the survey distribution was supervised by two Associate Professors, each affiliated with  
123 different academic institutions in Jordan—one from a public university and another from a  
124 private university to reach a wide spectrum of potential participants. Further distribution was  
125 carried out by the co-authors, who are medical students, utilizing Facebook and WhatsApp  
126 groups, which are popular communication channels among university students in Jordan. Data  
127 collection started on 7 July 2024 and concluded on 17 August 2024 and no incentives were  
128 offered to recruit potential participants.

### 129 **Sample size calculation**

130 To determine the minimum sample size for the estimation of the prevalence of vaping and  
131 tobacco consumption among university students in this study, we employed the Epitools online  
132 tool for estimating a proportion with specified precision [39]. The pre-defined parameters for  
133 this calculation included an estimated true proportion of 0.5, a precision of  $\pm 0.05$  with a

134 confidence level of 95%, considering the population size of about 350,000 university students  
135 [40]. This calculation yielded a required sample size of 385 participants. For the exploratory  
136 factor analysis (EFA) validation of the survey instrument used to assess the attitude to vaping,  
137 the sample size was derived based on analytical requirements specific to factor analysis. With  
138 23 items in our survey, we targeted a minimum of 115 participants (5 participants × 23 items)  
139 [41].

## 140 **Survey instrument development**

141 The survey items were initially developed in English and underwent a rigorous translation and  
142 back-translation process to ensure linguistic and conceptual accuracy in Arabic by both the first  
143 author and senior author, who are experts in tobacco research and survey methodology,  
144 respectively, and both bilingual in Arabic and English. This process aimed to preserve the  
145 content validity across linguistic variations. The survey was designed to explore various  
146 constructs pertinent to vaping based on the TPB constructs, including attitudes towards vaping,  
147 perceived social norms, and perceived behavioral control [13-17]. Pilot testing of the novel  
148 survey instrument was conducted on six medical students with subsequent feedback and minor  
149 editing to improve the clarity and readability of a few survey items.

150 The survey which was hosted on Google forms started by an introductory section on the study  
151 objectives and upon securing informed consent, demographic data were collected including  
152 age, sex, parental education, household income, and family tobacco use history, among others.

153 The survey included direct queries about tobacco usage as follows. (1) “Currently, do you  
154 smoke any kind (cigarettes, hookah, e-cigarettes (vape))?” and (2) “Are you currently using e-  
155 cigarettes (vaping)?”, with options for “Yes” or “No”.



156 Afterward, responses to 23 TPB-based attitudinal and behavioral items were introduced and  
157 measured using a 5-point Likert scale, ranging from “strongly agree” to “strongly disagree”.  
158 The constructs measured in the survey comprised the following: (A) Perceived Harm with three  
159 items: (1) I believe that vaping is less harmful compared to cigarettes; (2) I believe that vaping  
160 is less harmful compared to Narghile; and (3) E-cigarettes (vaping) can help smokers quit  
161 smoking or cut down on smoking.

162 (B) Perceived Enjoyment with two items: (1) I find vaping enjoyable; and (2) I find vaping  
163 satisfying. (C) Perceived Health Risks with three items: (1) I believe that vaping is associated  
164 with health risks; (2) I believe that vaping can lead to nicotine addiction; and (3) I am aware of  
165 anti-smoking policies within my university.

166 (D) Perceived Cost with two items: (1) I believe that vaping is less costly compared to  
167 cigarettes; and (2) I believe that vaping is less costly compared to Narghile. (E) Family and  
168 Peer Influence with five items: (1) My vaping experience is influenced by the behavior in my  
169 family; (2) I feel pressured to smoke by my peers; (3) My vaping experience is influenced by  
170 the behavior of my friends; (4) My role models in life consume tobacco in any form; and (5)  
171 Vaping is socially accepted among my peers.

172 (F) Media Influence with two items: (1) The portrayal of vaping in movies and series influences  
173 how I perceive it; and (2) The social media portrayal influence how I perceive vaping. (G)  
174 Confidence in Ability to Quit with two items: (1) I feel confident in my ability to resist vaping  
175 in social situations; and (2) I feel confident in my ability to quit vaping altogether. (H) Need to  
176 Cope with Stress with three items: (1) Academic stress affects my vaping habits; (2) I believe  
177 that vaping helps in social acceptance; and (3) I believe that vaping helps in stress reduction.

178 (I) Easy Access to Vaping with a single item: (1) I can easily obtain e-cigarettes.

## 179 **Statistical analysis**

180 The collected data from the survey was subjected to EFA employing principal component  
181 analysis (PCA) as the extraction method to uncover latent structures within the data. To  
182 accommodate the anticipated correlations among factors, an Oblimin rotation was applied. To  
183 evaluate the internal consistency of the scales derived from EFA, the Cronbach's  $\alpha$  was  
184 calculated for each inferred construct. Each extracted construct was quantified by averaging  
185 the scores of the items within it, with responses ranging from "strongly agree" (scored as 5) to  
186 "strongly disagree" (scored as 1). For the final VAPeS score as averaged based on the average  
187 score for the 23 items, categorization into two categories was conducted as follows: (1)  
188 Agreement category with a VAPeS score range of 3.68–5.00; and (2) Disagreement/neutral  
189 category with a VAPeS score range of 1.00–3.67.

190 Associations between categorical variables were assessed using the Chi-square ( $\chi^2$ ) test. For  
191 associations involving categorical and scale variables, normality was first checked using the  
192 Kolmogorov-Smirnov test, followed by the Mann-Whitney  $U$  test where appropriate  
193 considering the non-normality detected for the scale variables ( $P < .001$ ). Multivariate analysis  
194 through linear regression was used to explore factors that showed potential significance in  
195 univariate analyses ( $P < .100$ ) with collinearity testing using the Variance Inflation Factor (VIF).  
196 A  $P$ -value of less than .050 was considered statistically significant. Statistical analysis was  
197 conducted using IBM SPSS Statistics for Windows, Version 26.0.

198

199

200

## 201 **Results**

### 202 **The prevalence of tobacco use in the study sample and its** 203 **associated determinants**

204 The final study sample comprised 671 university students, with a mean age of 21.04±1.84  
205 years, a majority of females (n=424, 63.2%), and students at public universities (n=498,  
206 74.2%). Additionally, the study sample comprised a variety of students from different  
207 disciplines with the most common being medical students (n=236, 35.2%), followed by  
208 students in scientific schools (n=189, 28.2%), students in humanities schools (n=134, 20.0%),  
209 and students in health schools other than medical schools (n=112, 16.7%).

210 Moreover, the majority of participants reported parental education at the undergraduate level  
211 (for father education, 412 (61.4%) were undergraduates and for mother education 409 (61.0%)  
212 were undergraduates). A majority of the study sample reported a middle monthly income for  
213 the family (n=510, 76.0%) and a middle level of monthly monetary allowance (n=479, 71.4%).  
214 Slightly more than a third of the study participants had a family member (parents or siblings)  
215 who work as health care workers (n=226, 33.7%). A majority of the study participants reported  
216 having a family member (parents or siblings) who currently consume tobacco (n=484, 72.1%).

217 In the study sample, the overall prevalence of tobacco use of any kind was 30.0% (95%  
218 confidence interval (CI): 26.6%–33.5%), while the prevalence of (e-cigarette use) vaping  
219 among those who used any form of tobacco was 62.7% (95% CI: 55.9%–69.2%).

220 For tobacco use of any kind, univariate analysis showed that the following variables were  
221 associated with a higher tobacco use: (1) being a male compared to females (44.9% vs. 21.2%,  
222  $P<.001$ ); (2) enrollment in a private university compared to public universities (39.9% vs.

223 26.5%,  $P<.001$ ); (3) studying at a humanities school compared to scientific schools, health  
224 schools other than medicine, and medical schools (41.0% vs. 37.0% vs. 26.8% vs. 19.5%,  
225  $P<.001$ ); (4) having a family member who currently smokes (35.1% vs. 16.6%,  $P<.001$ ); (5)  
226 having a high self-reported monthly monetary allowance compared to low and middle  
227 allowances (41.6% vs. 35.0% vs. 26.7%,  $P=.009$ ); (6) having a high self-reported monthly  
228 family income compared to low and middle income (40.0% vs. 35.3% vs. 27.3%,  $P=.021$ ); and  
229 older age (mean: 21.3 years vs. 20.9 years,  $P=.043$ , **Table 1**).

230

231

232

233

234

235

236

237

238

239

240

241

242

243

244 **Table 1. Association between study variables and the consumption of any kind of tobacco**  
 245 **products and with vaping.**

| Variable                                                                    | Category             | Currently, do you smoke any kind (cigarettes, hookah, e-cigarettes)? |            | P value | Are you currently using e-cigarettes (vaping)? |           | P value <sup>b</sup> |
|-----------------------------------------------------------------------------|----------------------|----------------------------------------------------------------------|------------|---------|------------------------------------------------|-----------|----------------------|
|                                                                             |                      | Yes                                                                  | No         |         | Yes                                            | No        |                      |
|                                                                             |                      | Count (%)                                                            | Count (%)  |         | Count (%)                                      | Count (%) |                      |
| Age                                                                         | Mean±SD <sup>a</sup> | 21.3±1.97                                                            | 20.9±1.77  | .043    | 21.3±2.04                                      | 21.3±1.86 | .881                 |
| Sex                                                                         | Male                 | 111 (44.9)                                                           | 136 (55.1) | <.001   | 75 (67.6)                                      | 36 (32.4) | .112                 |
|                                                                             | Female               | 90 (21.2)                                                            | 334 (78.8) |         | 51 (56.7)                                      | 39 (43.3) |                      |
| University                                                                  | Public               | 132 (26.5)                                                           | 366 (73.5) | <.001   | 83 (62.9)                                      | 49 (37.1) | .938                 |
|                                                                             | Private              | 69 (39.9)                                                            | 104 (60.1) |         | 43 (62.3)                                      | 26 (37.7) |                      |
| School/Faculty                                                              | Medicine             | 46 (19.5)                                                            | 190 (80.5) | <.001   | 26 (56.5)                                      | 20 (43.5) | .048                 |
|                                                                             | Health (non-medical) | 30 (26.8)                                                            | 82 (73.2)  |         | 16 (53.3)                                      | 14 (46.7) |                      |
|                                                                             | Scientific           | 70 (37.0)                                                            | 119 (63.0) |         | 53 (75.7)                                      | 17 (24.3) |                      |
|                                                                             | Humanities           | 55 (41.0)                                                            | 79 (59.0)  |         | 31 (56.4)                                      | 24 (43.6) |                      |
| Father education                                                            | High school or less  | 45 (31.5)                                                            | 98 (68.5)  | .382    | 20 (44.4)                                      | 25 (55.6) | .015                 |
|                                                                             | Undergraduate        | 116 (28.2)                                                           | 296 (71.8) |         | 80 (69.0)                                      | 36 (31.0) |                      |
|                                                                             | Postgraduate         | 40 (34.5)                                                            | 76 (65.5)  |         | 26 (65.0)                                      | 14 (35.0) |                      |
| Mother education                                                            | High school or less  | 62 (33.3)                                                            | 124 (66.7) | .256    | 38 (61.3)                                      | 24 (38.7) | .935                 |
|                                                                             | Undergraduate        | 113 (27.6)                                                           | 296 (72.4) |         | 71 (62.8)                                      | 42 (37.2) |                      |
|                                                                             | Postgraduate         | 26 (34.2)                                                            | 50 (65.8)  |         | 17 (65.4)                                      | 9 (34.6)  |                      |
| Do you have any family members (parents, siblings) who work in health care? | Yes                  | 73 (32.3)                                                            | 153 (67.7) | .345    | 46 (63.0)                                      | 27 (37.0) | .942                 |
|                                                                             | No                   | 128 (28.8)                                                           | 317 (71.2) |         | 80 (62.5)                                      | 48 (37.5) |                      |
| How would you generally describe your family's monthly income?              | Low                  | 18 (35.3)                                                            | 33 (64.7)  | .021    | 9 (50.0)                                       | 9 (50.0)  | .483                 |
|                                                                             | Middle               | 139 (27.3)                                                           | 371 (72.7) |         | 88 (63.3)                                      | 51 (36.7) |                      |
|                                                                             | High                 | 44 (40.0)                                                            | 66 (60.0)  |         | 29 (65.9)                                      | 15 (34.1) |                      |
| How would you generally describe your monthly monetary allowance?           | Low                  | 36 (35.0)                                                            | 67 (65.0)  | .009    | 20 (55.6)                                      | 16 (44.4) | .492                 |
|                                                                             | Middle               | 128 (26.7)                                                           | 351 (73.3) |         | 84 (65.6)                                      | 44 (34.4) |                      |
|                                                                             | High                 | 37 (41.6)                                                            | 52 (58.4)  |         | 22 (59.5)                                      | 15 (40.5) |                      |
| Do you have any family members (parents, siblings) who currently smoke?     | Yes                  | 170 (35.1)                                                           | 314 (64.9) | <.001   | 101 (59.4)                                     | 69 (40.6) | .025                 |
|                                                                             | No                   | 31 (16.6)                                                            | 156 (83.4) |         | 25 (80.6)                                      | 6 (19.4)  |                      |

246 <sup>a</sup> SD: Standard deviation; <sup>b</sup> P values were calculated using the Chi square and Mann Whiteny U tests.

247  
 248  
 249 Univariate analysis also showed that the following variables were associated with higher  
 250 probability of e-cigarette use (vaping): (1) father education as undergraduate or postgraduate  
 251 compared to high school or less level of education (69.0% vs. 65.0% vs. 44.4%,  $P=.015$ ); lack  
 252 of family members (parents or siblings) who currently smoke compared to having a family  
 253 member who currently smokes (80.6% vs. 59.4%,  $P=.025$ ); and (3) being a student at scientific

254 schools compared to being a medical student, a student in humanities schools, a student in  
255 health schools other than medicine (75.7% vs. 56.5% vs. 56.4% vs. 53.3%,  $P=.048$ , **Table 1**).

## 256 **Psychometric properties of the novel VAPeS instrument**

257 The psychometric evaluation of the novel survey instrument used to assess attitudes and  
258 perceptions related to vaping among university students (VAPeS) revealed robust results as  
259 indicated by the Kaiser-Meyer-Olkin Measure of Sampling Adequacy which was high at 0.823  
260 suggesting that the sample size was adequate for the analysis performed. Bartlett's Test of  
261 Sphericity was significant ( $\chi^2=1539.159$ ,  $P<.001$ ), which confirmed that the correlation matrix  
262 was not an identity matrix and was suitable for factor analysis.

263 To extract factors from the survey items PCA was employed, with a total of 23 items loading  
264 significantly on five components with Eigenvalues  $>1.0$ , with five-factor solution explaining a  
265 cumulative total of 64.51% of the variance in responses. The first component accounted for  
266 31.79% of the variance, the second 12.81%, the third 7.63%, the fourth 6.38%, and the fifth  
267 5.90% (**Fig 1**).

268

269 **Fig 1. Scree plot of the Vaping Attitude and Perceptions Scale (VAPeS) 23 items using**  
270 **principal component analysis.**

271

272 The pattern matrix revealed clear loadings of items on respective factors which is suggestive  
273 of an acceptable construct validity. The first construct comprising 8 items with factors loading  
274 in the range of 0.889–0.557 showed a Cronbach's  $\alpha$  value of 0.888. This construct was termed  
275 "Social Influence" based on examination of the items of the construct which were: (1) My  
276 vaping experience is influenced by the behavior in my family; (2) I feel pressured to smoke by

277 my peers; (3) My vaping experience is influenced by the behavior of my friends; (4) My role  
278 models in life consume tobacco in any form; (5) Vaping is socially accepted among my peers;  
279 (6) The portrayal of vaping in movies and series influence how I perceive it; (7) The social  
280 media portrayal influence how I perceive vaping; and (8) I believe that vaping helps in social  
281 acceptance.

282 The second construct comprising three items was termed “Harm Perception” with factor  
283 loading range of 0.898–0.577, and a Cronbach’s  $\alpha=0.756$ : (1) I believe that vaping is less  
284 harmful compared to cigarettes; (2) I believe that vaping is less harmful compared to Narghile;  
285 and (3) E-cigarettes (vaping) can help smokers quit smoking or cut down on smoking. The  
286 third construct comprising two items with factor loadings of 0.638 and 0.587 and Cronbach’s  
287  $\alpha=0.688$  was termed “Vaping Pleasure”: (1) I find vaping enjoyable; and (2) I find vaping  
288 satisfying.

289 The fourth construct comprising six items with factor loadings range of 0.528–0.808, with a  
290 Cronbach’s  $\alpha=0.673$  was termed “Behavioral Influences”: (1) I believe that vaping is  
291 associated with health risks; (2) I believe that vaping can lead to nicotine addiction; (3) I am  
292 aware of anti-smoking policies within my university; (4) Academic stress affects my vaping  
293 habits; (5) I believe that vaping helps in stress reduction; and (6) I can easily obtain e-cigarettes.

294 Finally, the fifth construct comprising four items with factor loadings range of 0.859–0.668  
295 showed a Cronbach’s  $\alpha$  value of 0.792 and was termed “Economic and Self-Efficacy Factors”:  
296 (1) I believe that vaping is less costly compared to cigarettes; (2) I believe that vaping is less  
297 costly compared to Narghile; (3) I feel confident in my ability to resist vaping in social  
298 situations; and (4) I feel confident in my ability to quit vaping altogether.

299

300

301 **The determinants of attitude to vaping using the VAPeS scale in**  
302 **univariate analysis**

303 In univariate analysis, the following factors were significant determinants of agreement with  
304 the VAPeS items. Male sex (53.3% vs. 31.4% in females,  $P=.015$ ); and higher scores on the  
305 following VAPeS constructs: (1) Harm Perception (mean:  $3.96\pm 0.82$  for the agreement vs.  
306  $3.06\pm 0.83$  for the disagreement/neutral,  $P<.001$ ); (2) Vaping Pleasure (mean:  $4.18\pm 0.85$  for the  
307 agreement vs.  $3.44\pm 0.82$  for the disagreement,  $P<.001$ ); (3) Behavioral Influence (mean:  
308  $4.52\pm 0.42$  for the agreement vs.  $3.84\pm 0.75$  for the disagreement,  $P<.001$ ); (4) Economic  
309 Factors and Self-Efficacy (mean:  $4.24\pm 0.79$  for the agreement vs.  $3.41\pm 0.85$  for the  
310 disagreement,  $P<.001$ ); and (5) Social Influence (mean:  $3.95\pm 0.78$  for the agreement vs.  
311  $2.62\pm 0.65$  for the disagreement,  $P<.001$ , **Table 2**).

312

313

314

315

316

317

318

319

320



321 **Table 2. Association between various study variables with agreement with overall VAPeS**  
 322 **categories.**

| Categorical variable                                                       | Category             | VAPeS <sup>a</sup> category      |                       | P value |
|----------------------------------------------------------------------------|----------------------|----------------------------------|-----------------------|---------|
|                                                                            |                      | Disagreement/neutral<br>(1–3.67) | Agreement<br>(3.68–5) |         |
|                                                                            |                      | Count (%)                        | Count (%)             |         |
| Sex                                                                        | Male                 | 35 (46.7)                        | 40 (53.3)             | .015    |
|                                                                            | Female               | 35 (68.6)                        | 16 (31.4)             |         |
| University                                                                 | Public               | 48 (57.8)                        | 35 (42.2)             | .475    |
|                                                                            | Private              | 22 (51.2)                        | 21 (48.8)             |         |
| School/Faculty                                                             | Medicine             | 17 (65.4)                        | 9 (34.6)              | .494    |
|                                                                            | Health (non-medical) | 9 (56.3)                         | 7 (43.8)              |         |
|                                                                            | Scientific           | 30 (56.6)                        | 23 (43.4)             |         |
|                                                                            | Humanities           | 14 (45.2)                        | 17 (54.8)             |         |
| Father education                                                           | High school or less  | 13 (65.0)                        | 7 (35.0)              | .427    |
|                                                                            | Undergraduate        | 41 (51.2)                        | 39 (48.8)             |         |
|                                                                            | Postgraduate         | 16 (61.5)                        | 10 (38.5)             |         |
| Mother education                                                           | High school or less  | 20 (52.6)                        | 18 (47.4)             | .854    |
|                                                                            | Undergraduate        | 41 (57.7)                        | 30 (42.3)             |         |
|                                                                            | Postgraduate         | 9 (52.9)                         | 8 (47.1)              |         |
| Do you have any family members (parents, siblings) who work in healthcare? | Yes                  | 26 (56.5)                        | 20 (43.5)             | .869    |
|                                                                            | No                   | 44 (55.0)                        | 36 (45.0)             |         |
| How would you generally describe your family's monthly income?             | Low                  | 7 (77.8)                         | 2 (22.2)              | .298    |
|                                                                            | Middle               | 49 (55.7)                        | 39 (44.3)             |         |
|                                                                            | High                 | 14 (48.3)                        | 15 (51.7)             |         |
| How would you generally describe your monthly monetary allowance?          | Low                  | 8 (40.0)                         | 12 (60.0)             | .055    |
|                                                                            | Middle               | 53 (63.1)                        | 31 (36.9)             |         |
|                                                                            | High                 | 9 (40.9)                         | 13 (59.1)             |         |
| Do you have any family members (parents, siblings) who currently smoke?    | Yes                  | 55 (54.5)                        | 46 (45.5)             | .617    |
|                                                                            | No                   | 15 (60.0)                        | 10 (40.0)             |         |
| Scale variable                                                             |                      | Mean±SD <sup>b</sup>             | Mean±SD               | P value |
| Age                                                                        |                      | 21.56±2.3                        | 21.02±1.63            | .218    |
| Harm Perception                                                            |                      | 3.06±0.83                        | 3.96±0.82             | <.001   |
| Vaping Pleasure                                                            |                      | 3.44±0.82                        | 4.18±0.85             | <.001   |
| Behavioral Influence                                                       |                      | 3.84±0.75                        | 4.52±0.42             | <.001   |
| Economic Factors and Self-Efficacy                                         |                      | 3.41±0.85                        | 4.24±0.79             | <.001   |
| Social Influence                                                           |                      | 2.62±0.65                        | 3.95±0.78             | <.001   |

323 <sup>a</sup> VAPeS: Vaping Attitude and Perceptions Scale; <sup>b</sup> SD: Standard deviation; <sup>c</sup> P values were calculated  
 324 using the Chi square and Mann Whiteny U tests.

325  
 326  
 327  
 328  
 329

330 **The determinants of attitude to vaping using the VAPeS scale in**  
 331 **multivariate analysis**

332 The linear regression analysis to assess the determinants of VAPeS categories among the  
 333 participating students who indicated the current practice of vaping, yielded a significant model  
 334 as indicated by an F-test value of 24.029 ( $P < .001$ ), and the model explained 58.8% of the  
 335 variance ( $R^2 = 0.588$ , adjusted  $R^2 = 0.563$ ). The model indicated that the strongest predictors of  
 336 attitude to vaping were “Social Influence” ( $\beta = 0.494$ ,  $P < .001$ ), “Behavioral Influence”  
 337 ( $\beta = 0.206$ ,  $P = .008$ ), and sex which had a modest but significant negative influence ( $\beta = -0.154$ ,  
 338  $P = .018$ , **Table 3**).

339 **Table 3. Multivariate analysis for the determinants of vaping in the study sample based**  
 340 **on regression analysis.**

| Model (Dependent Variable: VAPeS <sup>a</sup> categories) | B ± standard error | 95.0% CI for B  | $\beta$ | t-statistic | P value         | Collinearity Statistics |                  |
|-----------------------------------------------------------|--------------------|-----------------|---------|-------------|-----------------|-------------------------|------------------|
|                                                           |                    |                 |         |             |                 | Tolerance               | VIF <sup>b</sup> |
| (Constant)                                                | -0.325±0.228       | (-0.775-0.126)  |         | -1.426      | .156            |                         |                  |
| Sex                                                       | -0.156±0.065       | (-0.285--0.027) | -0.154  | -2.394      | <b>.018</b>     | 0.846                   | 1.182            |
| Monetary allowance                                        | 0.033±0.053        | (-0.072-0.138)  | 0.039   | 0.626       | .532            | 0.920                   | 1.087            |
| Harm Perception                                           | 0.067±0.037        | (-0.007-0.140)  | 0.125   | 1.801       | .074            | 0.721                   | 1.388            |
| Vaping Pleasure                                           | 0.028±0.041        | (-0.053-0.109)  | 0.051   | 0.684       | .495            | 0.627                   | 1.596            |
| Behavioral Influence                                      | 0.144±0.054        | (0.038-0.250)   | 0.206   | 2.696       | <b>.008</b>     | 0.598                   | 1.672            |
| Economic Factors and Self-Efficacy                        | 0.044±0.040        | (-0.034-0.123)  | 0.082   | 1.116       | .267            | 0.651                   | 1.535            |
| Social Influence                                          | 0.255±0.037        | (0.181-0.328)   | 0.494   | 6.828       | <b>&lt;.001</b> | 0.667                   | 1.500            |

341 <sup>a</sup> VAPeS: Vaping Attitude and Perceptions Scale; <sup>b</sup> VIF: Variance Inflation Factor. Statistically  
 342 significant P values are highlighted in bold style.

343  
 344  
 345  
 346  
 347

348

## 349 **Discussion**

350 The principal objective of this study was to develop and validate a comprehensive survey  
351 instrument based on the TPB to analyze vaping behaviors among university students in Jordan.  
352 This objective is of particular relevance in Jordan among other Arab countries given the  
353 evolving patterns of tobacco use in the Middle East countries, where vaping has emerged as a  
354 prevalent alternative to traditional methods of tobacco consumption [8,31,37,42]. The selection  
355 of university students as the target study population was based on the recognition of this  
356 demographic as a susceptible group to trends in vaping due to its accessibility, perceived social  
357 acceptability, and aggressive marketing campaigns through channels commonly engaged by  
358 younger individuals, such as social media as elaborated by Struik et al. [43].

359 The findings from our study revealed a 30.0% prevalence of tobacco use among university  
360 students in Jordan, with 62.7% of those users reporting current use of vaping. In contextualizing  
361 our findings within the global setting, a recent systematic review by Salari et al. provided a  
362 comparative benchmark, revealing a global prevalence of vaping use among younger  
363 individuals at 16.8% for ever vaping users and 4.8% for current vaping users [44]. This  
364 highlights a significant engagement with vaping among youth worldwide, albeit lower than the  
365 prevalence observed in our Jordanian university students cohort which was estimated at 18.8%  
366 current vaping users. Furthermore, the systematic review by Salari et al. aligned with our  
367 observations of sex differences in vaping behaviors, with higher prevalence rates of vaping  
368 among males compared to females [44]. Specifically, males showed vaping prevalence rates of  
369 18.8% for ever vaping users and 4.9% for current vaping users compared to 27.4% of current  
370 vaping male users in our study [44]. In contrast, young females had significantly lower rates at  
371 9.9% for ever users and 1.6% for current users compared to 12.0% of current vaping female  
372 users in our study [44]. These findings highlight the sex-specific dynamics of vaping,

373 suggesting that interventions might need to be tailored differently for young males and females  
374 to effectively address these disparities in vaping behavior.

375 In line with our current findings, previous research within Jordan also highlighted the high  
376 prevalence of vaping with significant sex disparities in vaping behaviors. Specifically, a study  
377 by Al-Balas et al. reported an 18% prevalence of vaping nationally, with a notably higher  
378 prevalence among males (24.9%) compared to females (3.5%) [45]. Moreover, approximately  
379 47.3% of Jordanian participants perceived vaping as less detrimental than traditional cigarette  
380 smoking which might explain the upward trend in adopting vaping in the country [45].

381 Additionally, a recent narrative review focusing on vaping trends across Arab countries further  
382 supports the notion of a rising vaping prevalence in the region, which was noted to exceed 25%  
383 among the population in studies conducted between 2019 and 2021 [38]. Such trends support  
384 the finding of our study and highlight the critical need for targeted public health interventions  
385 and ongoing research to address the complex cultural and behavioral changes in tobacco use  
386 patterns in the Middle East with the rise of vaping [37].

387 In this study, the use of a novel survey instrument based on the TPB enabled a comprehensive  
388 assessment of the various psychological and social factors that could influence vaping attitudes  
389 and behavior. Based on this theoretical framework, we unraveled five factors that would drive  
390 the attitude to vaping among university students, namely, Harm Perception, Vaping Pleasure,  
391 Behavioral Influence, Economic Factors and Self-Efficacy, and Social Influence. This result  
392 appears fathomable considering the diverse motivations that could influence vaping, which  
393 range from sensory pleasure to economic considerations. Specifically, Harm Perception and  
394 Vaping Pleasure directly address the cognitive considerations and emotional rewards  
395 associated with vaping, which are crucial in forming individual attitudes to vaping. Recent  
396 studies highlighted a growing awareness of the potential harms of vaping, which would further

397 influence these attitudes [46,47]. Behavioral Influence and Social Influence highlight the  
398 significant impact of environmental (e.g., stress) and social contexts, suggesting that vaping  
399 behaviors are not only personal choices but also social phenomena which is consistent with the  
400 results of a study by Piombo et al. highlighting the role of social factors in vaping initiation  
401 [48]. Additionally, Valente et al. highlighted the influence of social networks on e-cigarette use  
402 among the youth, which should be considered in public health prevention and cessation  
403 programs [49]. Finally, the inclusion of Economic Factors and Self-Efficacy reflects practical  
404 and psychological dimensions of vaping, indicating that both cost-benefit analyses and  
405 perceived personal control and curiosity factors could play important roles in the decision-  
406 making processes related to vaping as elaborated on by Scheinfeld et al. [17]. The multifactorial  
407 model identified in the VAPeS scale could provide a robust framework for understanding the  
408 complex interplay of factors that would influence vaping, which is important to design tailored  
409 public health interventions to address the increasing trend of vaping [16].

410 In our study, multivariate analysis identified Social Influence as a crucial determinant of vaping  
411 behaviors, significantly shaped by peer behavior, media portrayals, and social acceptance. This  
412 factor is particularly important among the youth, who are deeply influenced by social norms  
413 and media. Additionally, Behavioral Influences, which include health risk awareness and  
414 personal vaping experiences, also significantly affected vaping attitudes and behaviors,  
415 consistent with the TPB. These findings highlighted how personal perceptions of risk, even if  
416 vaping is seen as less harmful could play a key role in individual vaping decisions which should  
417 be considered in the intervention measures.

418 Finally, it is important to consider the results of this study in light of the following limitations.  
419 The use of a convenience sampling strategy, while efficient, may limit the generalizability of  
420 the findings. Additionally, selection bias is expected considering the female predominance in

421 the sample which may have resulted from a dominance of female authors. Moreover, the cross-  
422 sectional design of the study restricts the ability to infer causality between the identified factors  
423 and vaping behavior.

424 To conclude, this study provided a validated tool for future research on vaping behaviors  
425 among young adults. We advocate for the broader adoption of the VAPeS scale to further  
426 explore the long-term effects of vaping and its dual role as both a potential smoking cessation  
427 aid and a gateway to nicotine addiction. Future research should also assess the psychological  
428 and socio-cultural determinants of vaping to enhance the effectiveness of targeted interventions  
429 and policy actions to address the rising vaping epidemic.

430

431

432

433

## 434 **Acknowledgments**

435 NA

## 436 **Funding**

437 We declare that we received no funding nor financial support/grants by any institutional, private or  
438 corporate entity.

## 439 **Conflicts of Interest**

440 We declare that we have no competing interest nor conflict of interest.

## 441 **Data Availability**

442 The data presented in this study are available on request from the corresponding author (MS).

## 443 **Author contribution**

444 **Conceptualization:** Muna Barakat and Malik Sallam

445 **Data curation:** Muna Barakat, Roa'a Abuarab, Baraah Alkharabsheh, Nada Budair, Mais Fareed,  
446 Rahma Kharabsheh, Dana Oshroq Laban, Malik Sallam

447 **Formal analysis:** Malik Sallam

448 **Investigation:** Muna Barakat, Roa'a Abuarab, Baraah Alkharabsheh, Nada Budair, Mais Fareed,  
449 Rahma Kharabsheh, Dana Oshroq Laban, Malik Sallam

450 **Methodology:** Muna Barakat, Roa'a Abuarab, Baraah Alkharabsheh, Nada Budair, Mais Fareed,  
451 Rahma Kharabsheh, Dana Oshroq Laban, Malik Sallam

452 **Project administration:** Malik Sallam

453 **Software:** Malik Sallam

454 **Resources:** Muna Barakat and Malik Sallam

455 **Supervision:** Malik Sallam

456 **Validation:** Muna Barakat and Malik Sallam

457 **Visualization:** Malik Sallam

458 **Writing – original draft:** Malik Sallam

459 **Writing – review & editing:** Muna Barakat, Roa'a Abuarab, Baraah Alkharabsheh, Nada Budair, Mais

460 Fareed, Rahma Kharabsheh, Dana Oshroq Laban, Malik Sallam

461



## 462 References

- 463 1. West R. Tobacco smoking: Health impact, prevalence, correlates and interventions. *Psychol*  
464 *Health*. Aug 2017;32(8):1018-1036. doi:10.1080/08870446.2017.1325890
- 465 2. Reitsma MB, Kendrick PJ, Ababneh E, et al. Spatial, temporal, and demographic patterns in  
466 prevalence of smoking tobacco use and attributable disease burden in 204 countries and territories,  
467 1990–2019: a systematic analysis from the Global Burden of Disease Study 2019. *The Lancet*.  
468 2021;397(10292):2337-2360. doi:10.1016/S0140-6736(21)01169-7
- 469 3. Alkouri O, Khader Y, Al-Bashaireh AM. Prevalence of Cigarettes and Waterpipe Smoking  
470 among Jordanians, Refugees, and Migrants in Jordan and Its Associated Factors: A Secondary Data  
471 Analysis. *Int J Environ Res Public Health*. Dec 21 2022;20(1)doi:10.3390/ijerph20010082
- 472 4. Tsoh JY, Hessler D, Parra JR, Bowyer V, Lugtu K, Potter MB. Addressing tobacco use in the  
473 context of complex social needs: A new conceptual framework and approach to address smoking  
474 cessation in community health centers. *PEC Innov*. Dec 2022;1:100011.  
475 doi:10.1016/j.pecinn.2021.100011
- 476 5. Lakshmi R, Romate J, Rajkumar E, George AJ, Wajid M. Factors influencing tobacco use  
477 behaviour initiation - From the perspective of the Capability, Opportunity, Motivation- Behaviour  
478 (COM-B) Model. *Heliyon*. Jun 2023;9(6):e16385. doi:10.1016/j.heliyon.2023.e16385
- 479 6. Sapru S, Vardhan M, Li Q, Guo Y, Li X, Saxena D. E-cigarettes use in the United States:  
480 reasons for use, perceptions, and effects on health. *BMC Public Health*. 2020/10/09 2020;20(1):1518.  
481 doi:10.1186/s12889-020-09572-x
- 482 7. Campus B, Fafard P, St Pierre J, Hoffman SJ. Comparing the regulation and incentivization  
483 of e-cigarettes across 97 countries. *Soc Sci Med*. Dec 2021;291:114187.  
484 doi:10.1016/j.socscimed.2021.114187
- 485 8. Barakat M, Jirjees F, Al-Tammemi AaB, et al. The Era of E-Cigarettes: A Cross-Sectional  
486 Study of Vaping Preferences, Reasons for Use and Withdrawal Symptoms Among Current E-  
487 Cigarette Users in the United Arab Emirates. *Journal of Community Health*. 2021/10/01  
488 2021;46(5):876-886. doi:10.1007/s10900-021-00967-4
- 489 9. Alshanberi AM, Baljoon T, Bokhari A, et al. The prevalence of E-cigarette uses among  
490 medical students at Umm Al-Qura University; a cross-sectional study 2020. *J Family Med Prim Care*.  
491 Sep 2021;10(9):3429-3435. doi:10.4103/jfmpc.jfmpc\_1496\_20
- 492 10. Amrock SM, Zakhar J, Zhou S, Weitzman M. Perception of e-cigarette harm and its  
493 correlation with use among U.S. adolescents. *Nicotine Tob Res*. Mar 2015;17(3):330-6.  
494 doi:10.1093/ntr/ntu156
- 495 11. Carrillo G, Mendez-Dominguez NI, Acosta Enriquez ME, Morán-Martínez J. Attitudes,  
496 Behaviors, and Perceptions of Students Vaping in Three Mexican Universities. *Int J Environ Res*  
497 *Public Health*. Apr 10 2024;21(4):464. doi:10.3390/ijerph21040464
- 498 12. Barakat MM, Al-Qudah RaA, Alfayoumi I, Al-Obaidi HJ, Jirjees FJ, Bsheti I. Electronic  
499 cigarettes' withdrawal severity symptoms among users during intermittent fasting: a cross-sectional  
500 study. *Addiction Science & Clinical Practice*. 2021/02/05 2021;16(1):10. doi:10.1186/s13722-021-  
501 00219-9

- 502 13. Ajzen I. The theory of planned behavior. *Organizational behavior and human decision*  
503 *processes*. 1991;50(2):179-211.
- 504 14. Asare M. Using the Theory of Planned Behavior to Determine the Condom Use Behavior  
505 Among College Students. *Am J Health Stud*. 2015;30(1):43-50.
- 506 15. Patwary MM, Bardhan M, Disha AS, et al. Determinants of COVID-19 Vaccine Acceptance  
507 among the Adult Population of Bangladesh Using the Health Belief Model and the Theory of Planned  
508 Behavior Model. *Vaccines (Basel)*. Nov 25 2021;9(12)doi:10.3390/vaccines9121393
- 509 16. Simpson EEA, Davison J, Doherty J, et al. Employing the theory of planned behaviour to  
510 design an e-cigarette education resource for use in secondary schools. *BMC Public Health*. Feb 11  
511 2022;22(1):276. doi:10.1186/s12889-022-12674-3
- 512 17. Scheinfeld E, Crook B, Perry CL. Understanding Young Adults' E-cigarette Use through the  
513 Theory of Planned Behavior. *Health Behav Policy Rev*. Mar 2019;6(2):115-127.  
514 doi:10.14485/hbpr.6.2.1
- 515 18. Shalaby SF, Soliman MA. Knowledge, attitude, and practice of medical students regarding  
516 smoking and substance abuse, Cairo University, Egypt. *J Egypt Public Health Assoc*. Feb 26  
517 2019;94(1):11. doi:10.1186/s42506-019-0011-z
- 518 19. Ghaffari M, Rakhshanderou S, Najafzadeh K, Ramezankhani A, Latifi M. Determinants of  
519 medical students for intention to organ donation: Application of theory of planned behavior. *Saudi J*  
520 *Kidney Dis Transpl*. Nov-Dec 2019;30(6):1375-1380. doi:10.4103/1319-2442.275481
- 521 20. Karimy M, Zareban I, Araban M, Montazeri A. An Extended Theory of Planned Behavior  
522 (TPB) Used to Predict Smoking Behavior Among a Sample of Iranian Medical Students. *Int J High*  
523 *Risk Behav Addict*. Sep 2015;4(3):e24715. doi:10.5812/ijhrba.24715
- 524 21. Shi H, Wang J, Huang R, et al. Application of the extended theory of planned behavior to  
525 understand Chinese students' intention to improve their oral health behaviors: a cross-sectional study.  
526 *BMC Public Health*. Dec 19 2021;21(1):2303. doi:10.1186/s12889-021-12329-9
- 527 22. Lareyre O, Gourlan M, Stoebner-Delbarre A, Cousson-Gélie F. Characteristics and impact of  
528 theory of planned behavior interventions on smoking behavior: A systematic review of the literature.  
529 *Prev Med*. Feb 2021;143:106327. doi:10.1016/j.ypmed.2020.106327
- 530 23. Karimy M, Niknami S, Hidarnia AR, Hajizadeh I. Intention to start cigarette smoking among  
531 Iranian male adolescents: usefulness of an extended version of the theory of planned behaviour. *Heart*  
532 *Asia*. 2012;4(1):120-4. doi:10.1136/heartasia-2012-010140
- 533 24. Zaheri H, Raziani Y, Khademi N, Moradi Y, Shahriari H, Ghanei-Gheshlagh R. Prevalence of  
534 hookah smoking among Iranian pupils and university students: An updated systematic review and  
535 meta-analysis. *Clin Respir J*. Jun 2022;16(6):425-440. doi:10.1111/crj.13511
- 536 25. Jradi H, Al-Shehri A. Knowledge about tobacco smoking among medical students in Saudi  
537 Arabia: findings from three medical schools. *J Epidemiol Glob Health*. Dec 2014;4(4):269-76.  
538 doi:10.1016/j.jegh.2014.04.001
- 539 26. Sreeramareddy CT, Suri S, Menezes RG, et al. Self-reported tobacco smoking practices  
540 among medical students and their perceptions towards training about tobacco smoking in medical  
541 curricula: A cross-sectional, questionnaire survey in Malaysia, India, Pakistan, Nepal, and  
542 Bangladesh. *Substance Abuse Treatment, Prevention, and Policy*. 2010/11/16 2010;5(1):29.  
543 doi:10.1186/1747-597X-5-29

- 544 27. Mofatteh M. Risk factors associated with stress, anxiety, and depression among university  
545 undergraduate students. *AIMS Public Health*. 2021;8(1):36-65. doi:10.3934/publichealth.2021004
- 546 28. Bergmann C, Muth T, Loerbroks A. Medical students' perceptions of stress due to academic  
547 studies and its interrelationships with other domains of life: a qualitative study. *Med Educ Online*. Dec  
548 2019;24(1):1603526. doi:10.1080/10872981.2019.1603526
- 549 29. Resano JEP, Regencia ZJG, Baja ES. Association between smoking and vaping usage and  
550 perceived stress levels of undergraduate nursing students in Manila, Philippines. *Journal of Public  
551 Health and Emergency*. 2022;7
- 552 30. McKelvey K, Attonito J, Madhivanan P, Yi Q, Mzayek F, Maziak W. Determinants of  
553 cigarette smoking initiation in Jordanian schoolchildren: longitudinal analysis. *Nicotine Tob Res*. May  
554 2015;17(5):552-8. doi:10.1093/ntr/ntu165
- 555 31. Barakat M, Assaf AM, Al-Qudah Ra, et al. Perception of adults toward electronic cigarettes: a  
556 cross-sectional study from Jordan. *Primary Health Care Research & Development*. 2021;22:e3. e3.  
557 doi:10.1017/S1463423621000062
- 558 32. Al-Haqwi AI, Tamim H, Asery A. Knowledge, attitude and practice of tobacco smoking by  
559 medical students in Riyadh, Saudi Arabia. *Ann Thorac Med*. Jul 2010;5(3):145-8. doi:10.4103/1817-  
560 1737.65044
- 561 33. Stubbs B, Veronese N, Vancampfort D, et al. Perceived stress and smoking across 41  
562 countries: A global perspective across Europe, Africa, Asia and the Americas. *Scientific Reports*.  
563 2017/08/08 2017;7(1):7597. doi:10.1038/s41598-017-07579-w
- 564 34. Abu-Helalah MA, Alshraideh HA, Al-Serhan AA, Nesheiwat AI, Da'na M, Al-Nawafleh A.  
565 Epidemiology, attitudes and perceptions toward cigarettes and hookah smoking amongst adults in  
566 Jordan. *Environ Health Prev Med*. Nov 2015;20(6):422-33. doi:10.1007/s12199-015-0483-1
- 567 35. Al-Natour A, Gillespie GL, Alzoubi F. "We cannot stop smoking": Female university  
568 students' experiences and perceptions. *Appl Nurs Res*. Oct 2021;61:151477.  
569 doi:10.1016/j.apnr.2021.151477
- 570 36. Istenic D, Gavic L, Tadin A. Prevalence of Use and Knowledge about Tobacco Products and  
571 Their Harmful Effects among University Students in Southern Croatia. *Healthcare (Basel)*. Mar 6  
572 2023;11(5)doi:10.3390/healthcare11050771
- 573 37. Al-Hamdani M, Brett Hopkins D. E-cigarettes in the Middle East: The known, unknown, and  
574 what needs to be known next. *Preventive Medicine Reports*. 2023/02/01/ 2023;31:102089.  
575 doi:10.1016/j.pmedr.2022.102089
- 576 38. Jirjees F, Dallal Bashi YH, Kharaba Z, Ahmadi K, Barakat M, AlObaidi H. Public awareness,  
577 prevalence, and regulations for the sale of electronic cigarettes in Arab countries: A narrative review.  
578 *Tob Induc Dis*. 2023;21:143. doi:10.18332/tid/168435
- 579 39. Epitools - Epidemiological Calculators. Sample size to estimate a proportion or apparent  
580 prevalence with specified precision. 2024. 2024. <https://epitools.ausvet.com.au/oneproportion>
- 581 40. The Ministry of Higher Education and Scientific Research in Jordan. Statistics. 2024. 2024.  
582 <https://mohe.gov.jo/EN/List/Statistics>

- 583 41. Boateng GO, Neilands TB, Frongillo EA, Melgar-Quiñonez HR, Young SL. Best Practices  
584 for Developing and Validating Scales for Health, Social, and Behavioral Research: A Primer. *Front*  
585 *Public Health*. 2018;6:149. doi:10.3389/fpubh.2018.00149
- 586 42. Alhalafi A. The Use of Electronic Cigarettes in Saudi Arabia: A Narrative Review. *Cureus*.  
587 Feb 2024;16(2):e54167. doi:10.7759/cureus.54167
- 588 43. Struik LL, Dow-Fleisner S, Belliveau M, Thompson D, Janke R. Tactics for Drawing Youth  
589 to Vaping: Content Analysis of Electronic Cigarette Advertisements. *J Med Internet Res*. Aug 14  
590 2020;22(8):e18943. doi:10.2196/18943
- 591 44. Salari N, Rahimi S, Darvishi N, Abdolmaleki A, Mohammadi M. The global prevalence of E-  
592 cigarettes in youth: A comprehensive systematic review and meta-analysis. *Public Health Pract (Oxf)*.  
593 Jun 2024;7:100506. doi:10.1016/j.puhip.2024.100506
- 594 45. Al-Balas HI, Al-Balas M, Al-Balas H, Almehaiza S, Melhem HB, Al-Balas B. Electronic  
595 Cigarettes Prevalence and Awareness Among Jordanian Individuals. *J Community Health*. Jun  
596 2021;46(3):587-590. doi:10.1007/s10900-020-00904-x
- 597 46. Jackson SE, Tattan-Birch H, East K, Cox S, Shahab L, Brown J. Trends in Harm Perceptions  
598 of E-Cigarettes vs Cigarettes Among Adults Who Smoke in England, 2014-2023. *JAMA Netw Open*.  
599 Feb 5 2024;7(2):e240582. doi:10.1001/jamanetworkopen.2024.0582
- 600 47. Rohde JA, Noar SM, Mendel JR, et al. E-Cigarette Health Harm Awareness and  
601 Discouragement: Implications for Health Communication. *Nicotine Tob Res*. Jun 12 2020;22(7):1131-  
602 1138. doi:10.1093/ntr/ntz194
- 603 48. Piombo SE, Barrington-Trimis J, Valente TW. Impact of social networks and norms on e-  
604 cigarette use among adolescents in Southern California: a prospective cohort study. *BMJ Public*  
605 *Health*. 2023;1(1)doi:10.1136/bmjph-2023-000163
- 606 49. Valente TW, Piombo SE, Edwards KM, Waterman EA, Banyard VL. Social Network  
607 Influences on Adolescent E-cigarette Use. *Subst Use Misuse*. 2023;58(6):780-786.  
608 doi:10.1080/10826084.2023.2188429
- 609

# Scree Plot

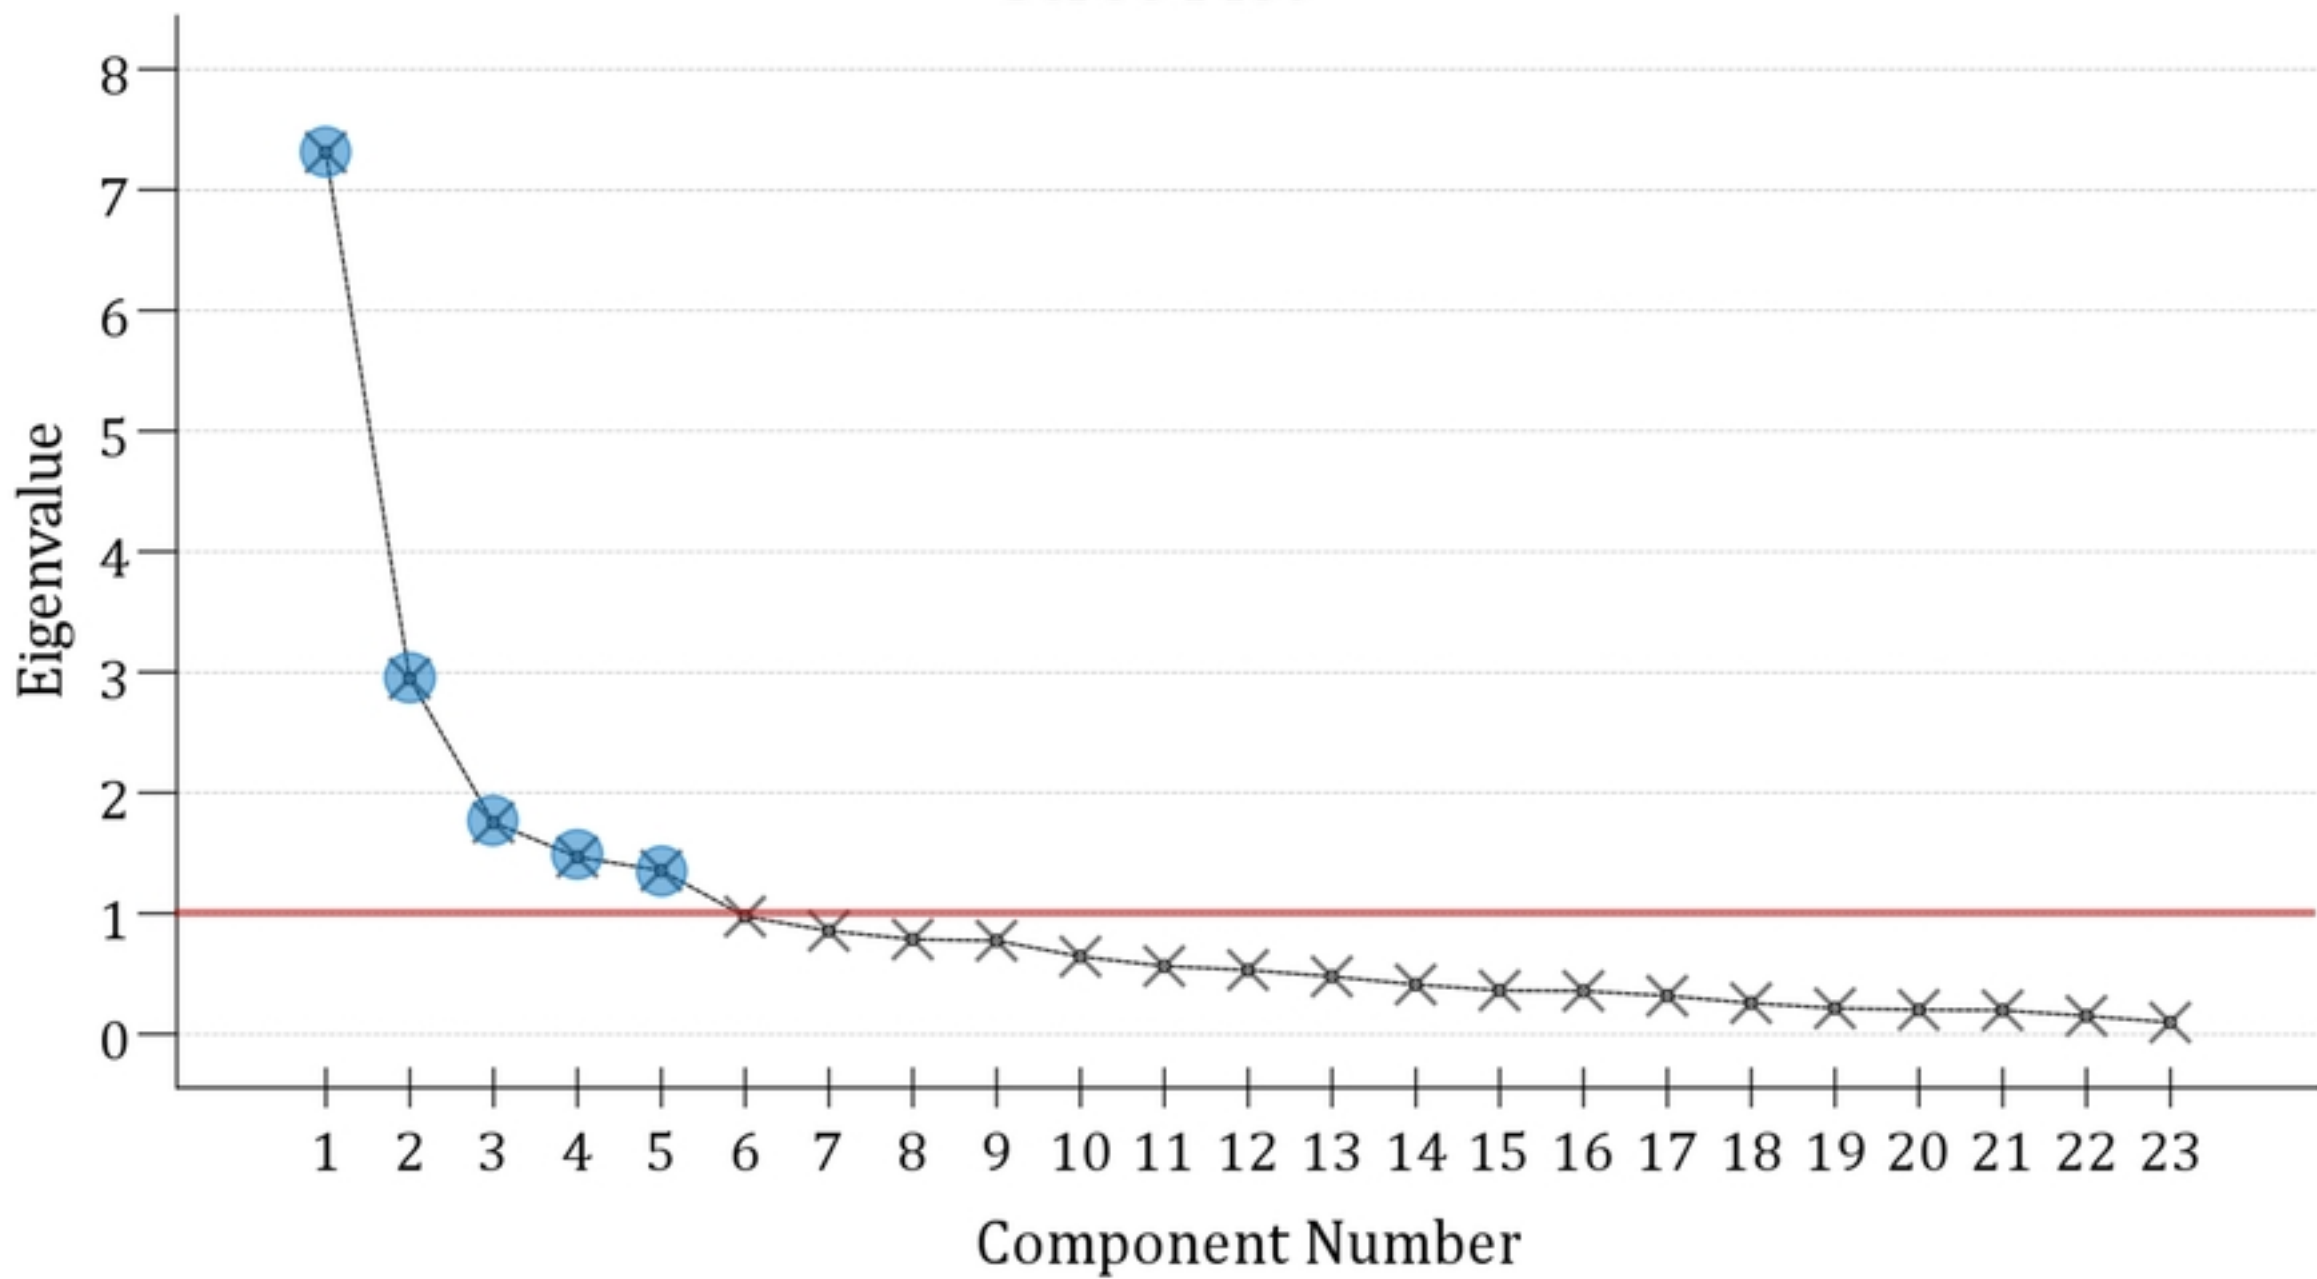

Figure
